# Supplementary material for: 地域における商店街の存立意義と共生・協働のまちづくり : 京都市西新道錦会商店街振興組合を事例として
Source: Royal Society of Chemistry journal article supplement (doi:10.1039/c4cp01412j), 2010-03-01
Supplement: c4cp01412j1.pdf [file c4cp01412j1.pdf]

Supporting information for

## Boron doped defected graphene as potential anode materials for Li-ion batteries

Rahul P. Hardikar<sup>a</sup>, Deya Das<sup>a</sup>, Sang soo Han<sup>b</sup>, Kwang-Ryeol Lee<sup>b</sup>, and Abhishek K. Singh<sup>a</sup>

<sup>a</sup>Materials Research Centre, Indian Institute of Science, Bangalore 560012, India

<sup>b</sup>Korea Institute of Science and Technology, Hwarangno 14-gil 5, Seongbuk-gu, Seol 136-791, Korea

### 1. 3D plot of energy barriers for 2-boron doped mono-vacancy structure.

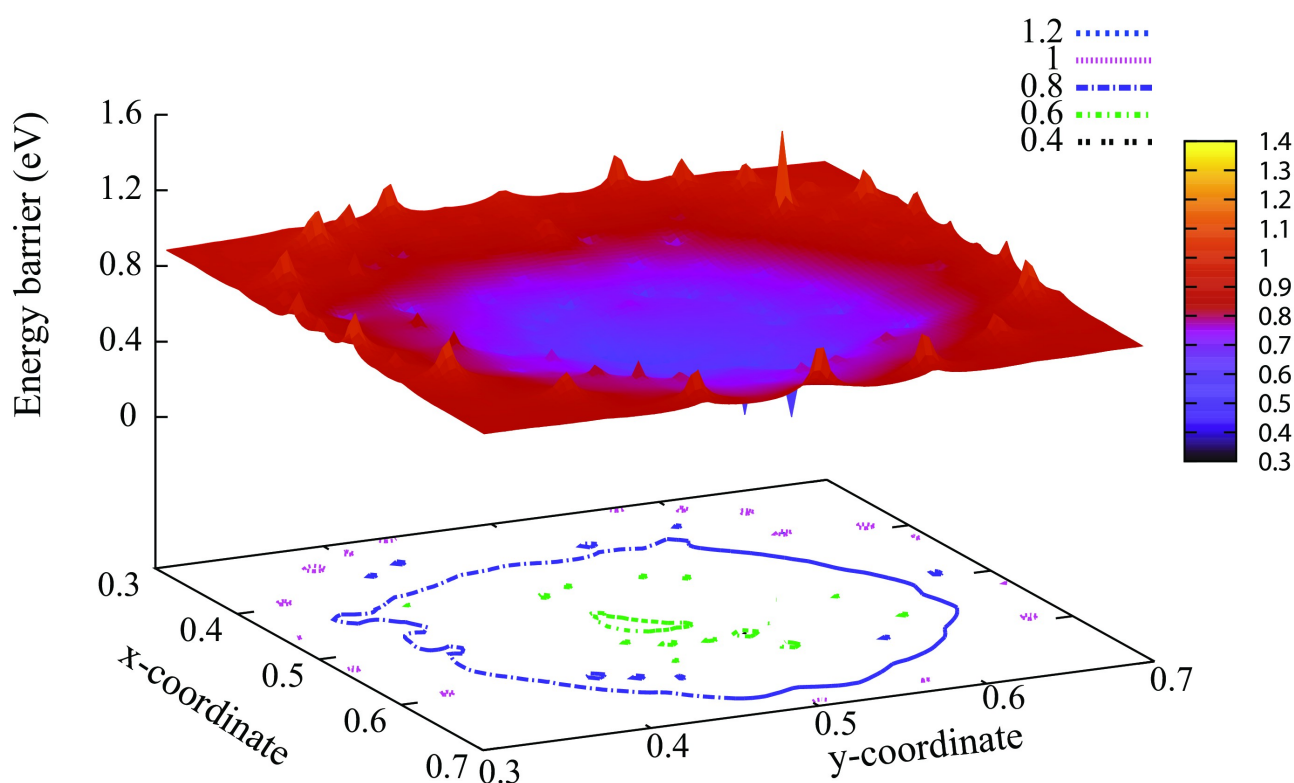

**Fig S1:** Figure shows 3D plot of potential energy surface of Li on two boron doped mono-vacancy defect in graphene. The green contour shows lowest barrier Li diffusion path.
